# Supplementary material
Source: PubMed Central journal article supplement (PMC6200130)
Supplement: msw243_suppl.pdf [file msw243_suppl.pdf]

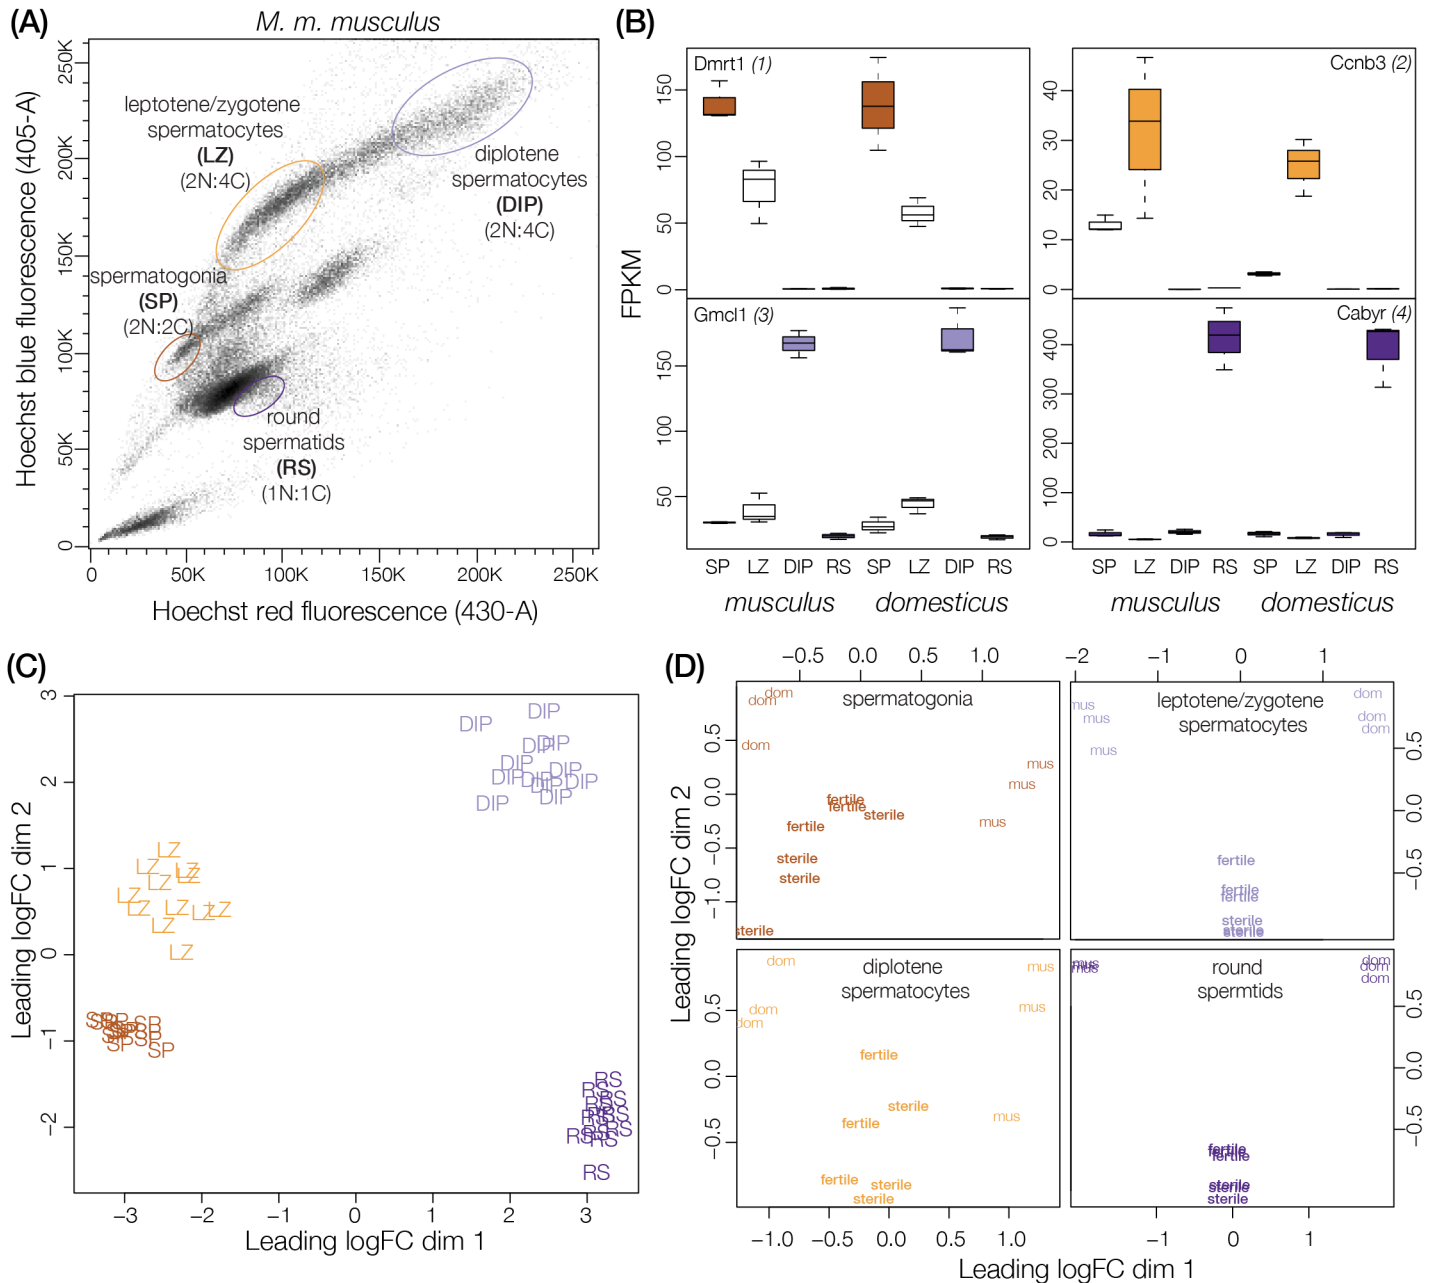

**Figure S1. FACS enrichment of spermatogenesis cell populations.** **(A)** Targeted cell populations, spanning spermatogenesis, highlighted on a profile of sorted testis cells from a fertile mouse. Dead cells were stained with propidium iodide, excited at 488 nm and detected with 585/42 bandpass filter. Live cells were stained with Hoechst, excited at 405 nm and detected with 450/40 (blue-shifted) and 610/20 (red-shifted) bandpass filters. FACS cell populations were gated to maximize the purity of each cell population. We optimized our protocol for cell purity using both gene expression metrics and microscopy. Due to the limited number of cells obtained per animal in each FACS experiment, we first assessed the purity of sorted cell populations using fertile mice, prior to collecting our final cell populations for experimental males. Initially populations were sorted into PBS with gating around boundary populations roughly corresponding to that of Getun et al. (2011). We then concentrated sorted cells using Cytospin 2, stained cells with hematoxylin and eosin, and visualized cell populations at 20X magnification. This process was iterated several times, with subsequent sorts resulting in better cell population separation, gating, and increased purity. We then further validated purity using a Thor Labs iCys Laser Scanning Cytometer to spot check sorts until fine-tuning was complete. **(B)** Gene expression (FPKM) in targeted cell populations for four autosomal genes with cell-specific expression patterns. (1) Raymond et al. 2000, *Genes Dev*, (2) Maekawa et al. 2004, *Arch Histol Cytol*, (3) Nguyen et al. 2002, *J Biol Chem*, (4) Li et al. 2007, *J Biol Chem*. **(C)** Multidimensional scaling plots of distances among cell populations and **(D)** among crosses. Distances are calculated as the root-mean-square deviation (Euclidean distance) of log<sub>2</sub> fold changes among genes that distinguish each cell type/cross.

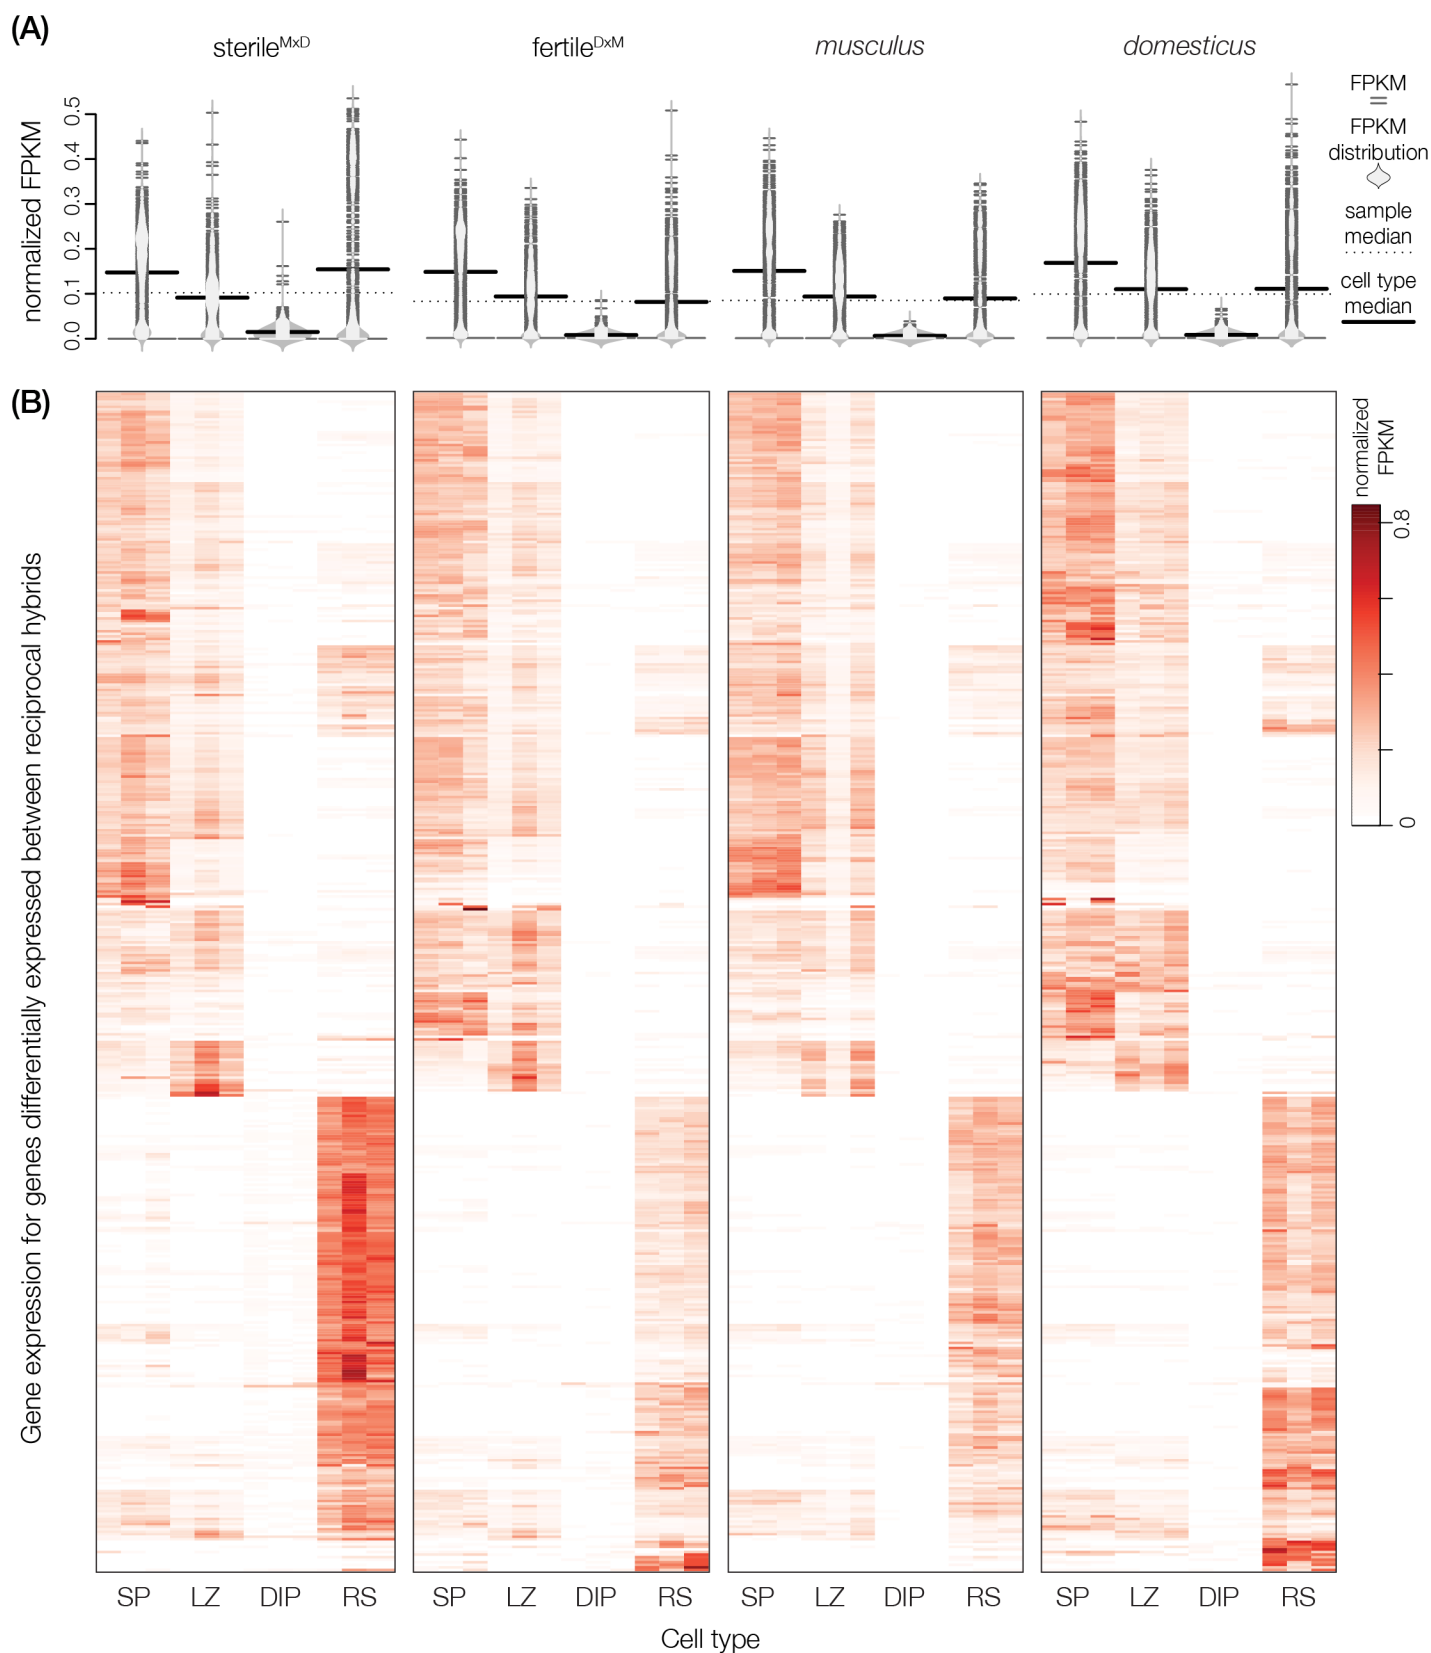

**Figure S2. X-linked gene expression among different crosses. (A)** Expression distributions for X-linked DE genes. Plotted with the R package beanplot (Kampstra 2008). **(B)** X-linked gene expression plotted as normalized FPKM values that are hierarchically clustered using Euclidean distance. FPKM values are normalized so that the sum of squares equals one, R package vegan (Oksanen et al. 2015).

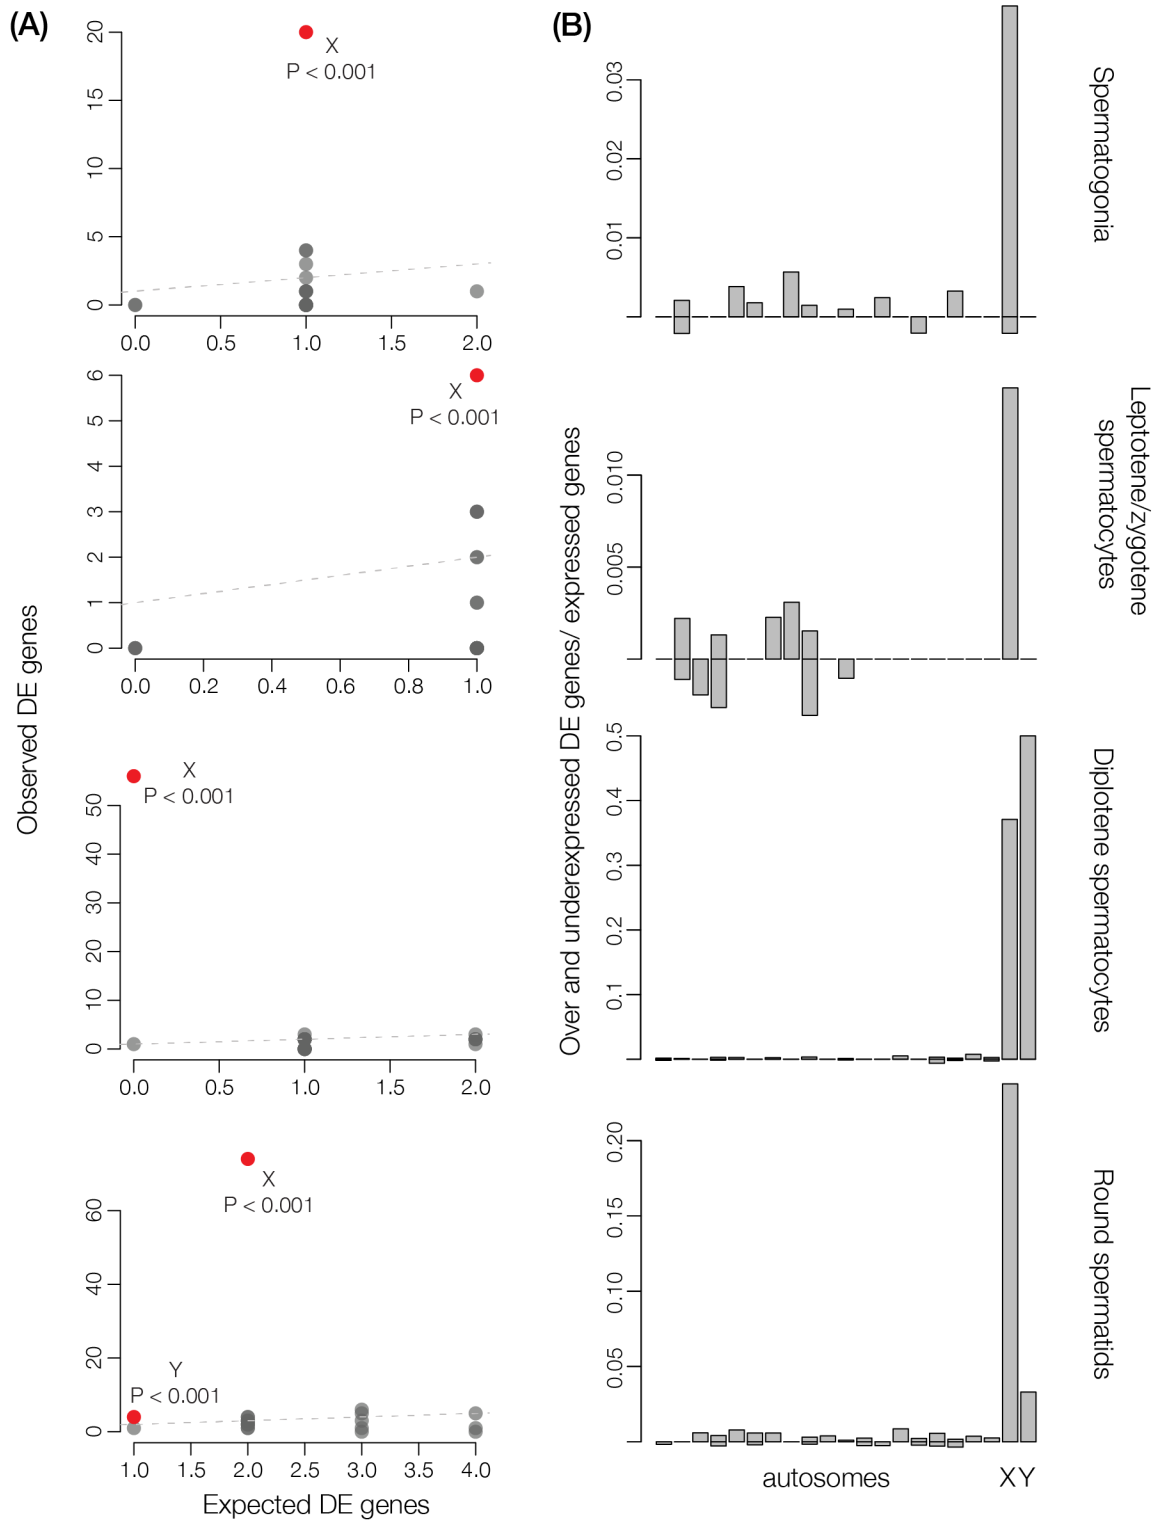

**Figure S3. The X chromosome is enriched for genes with disrupted expression in sterile hybrids.** (A) The ratio of observed and expected DE genes in comparisons between sterile<sup>MxD</sup> hybrids and all fertile males. Expected values are based on the portion of expressed autosomal genes that are DE and are rounded to the nearest integer. Significance is based on chromosome-wise hypergeometric test for enrichment. (B) The proportion of over (above) or under (below) expressed genes that are DE per chromosome.

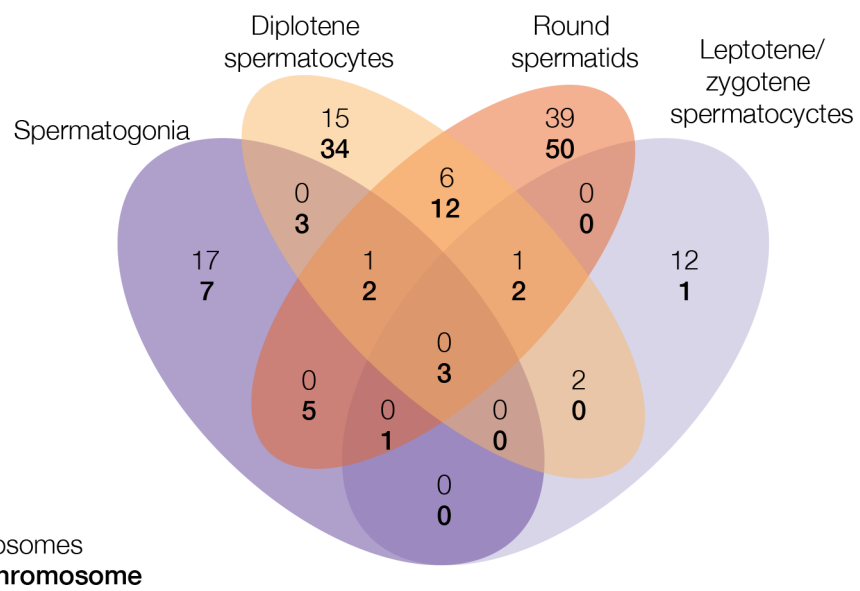

**Figure S4. Disrupted gene expression varies with developmental stage.** Venn diagram showing the overlap among autosomal and X-linked (**bold**) genes that were differentially expressed between sterile<sup>MxD</sup> hybrids and all fertile males in different spermatogenic cell populations. There was very little overlap in DE genes among the developmental time points. Data were plotted with the R package VennDiagram (Chen and Boutros 2011).

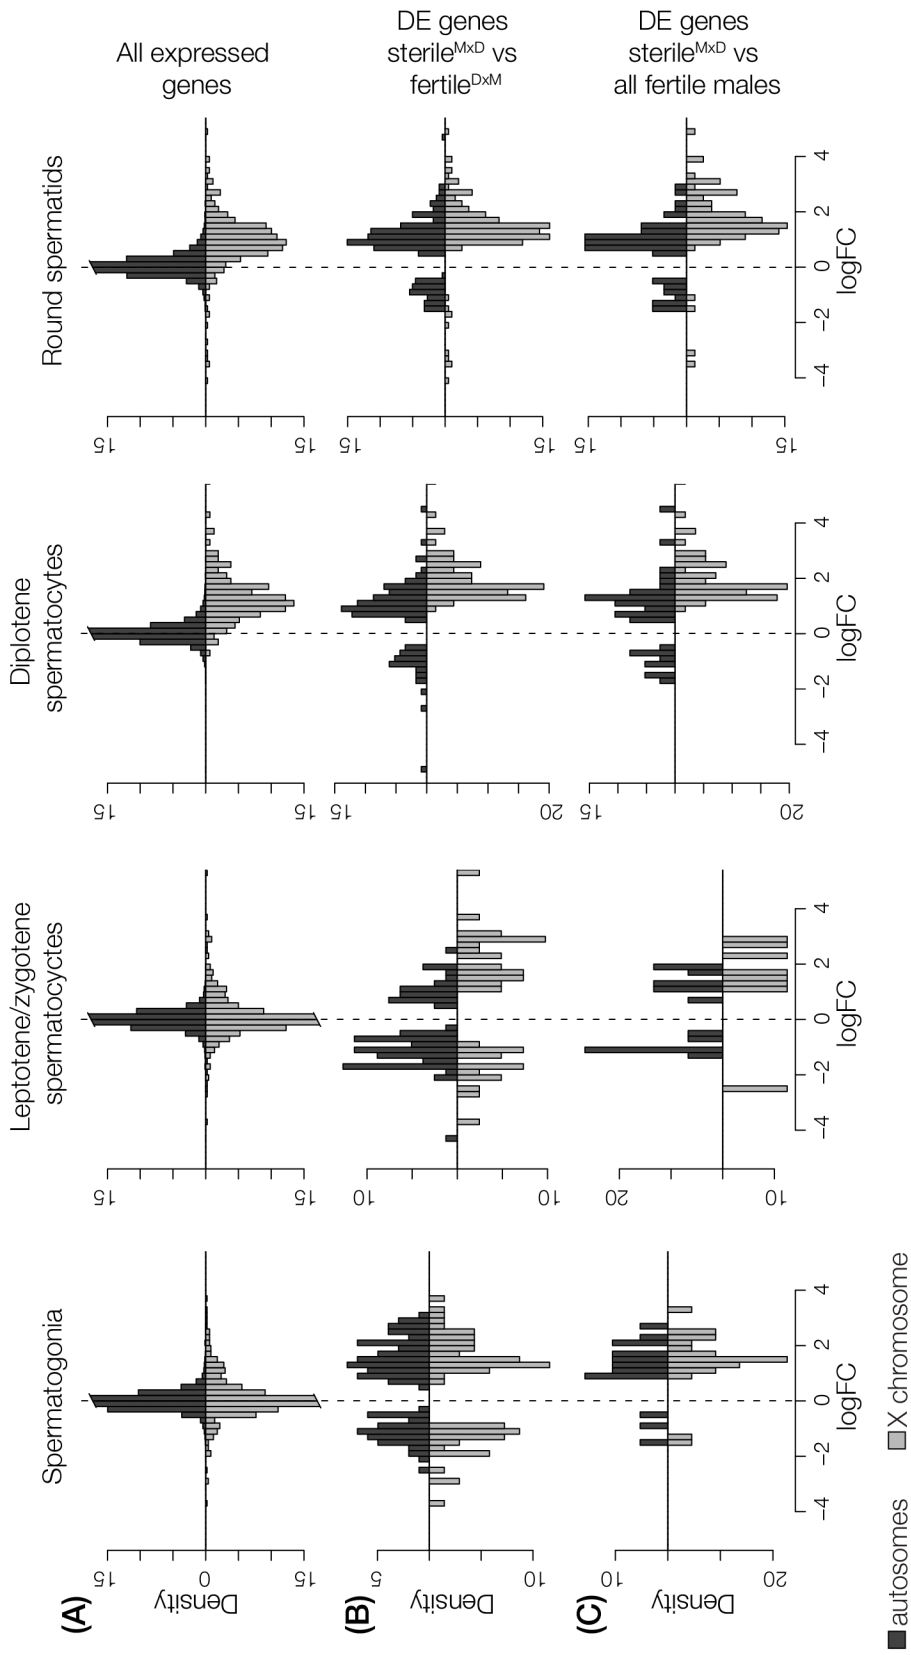

■ autosomes    ■ X chromosome

**Figure S5. Genes with disrupted expression in sterile<sup>MxD</sup> hybrids tend to be overexpressed.** Density histograms of logFC between sterile<sup>MxD</sup> and fertile<sup>DxM</sup> hybrids for autosomal and X-linked genes expressed in each cell type. Each panel shows a different set of genes: **(A)** all expressed genes, **(B)** DE genes between sterile<sup>MxD</sup> and fertile<sup>DxM</sup> hybrids, **(C)** and DE genes between sterile<sup>MxD</sup> and all fertile males.

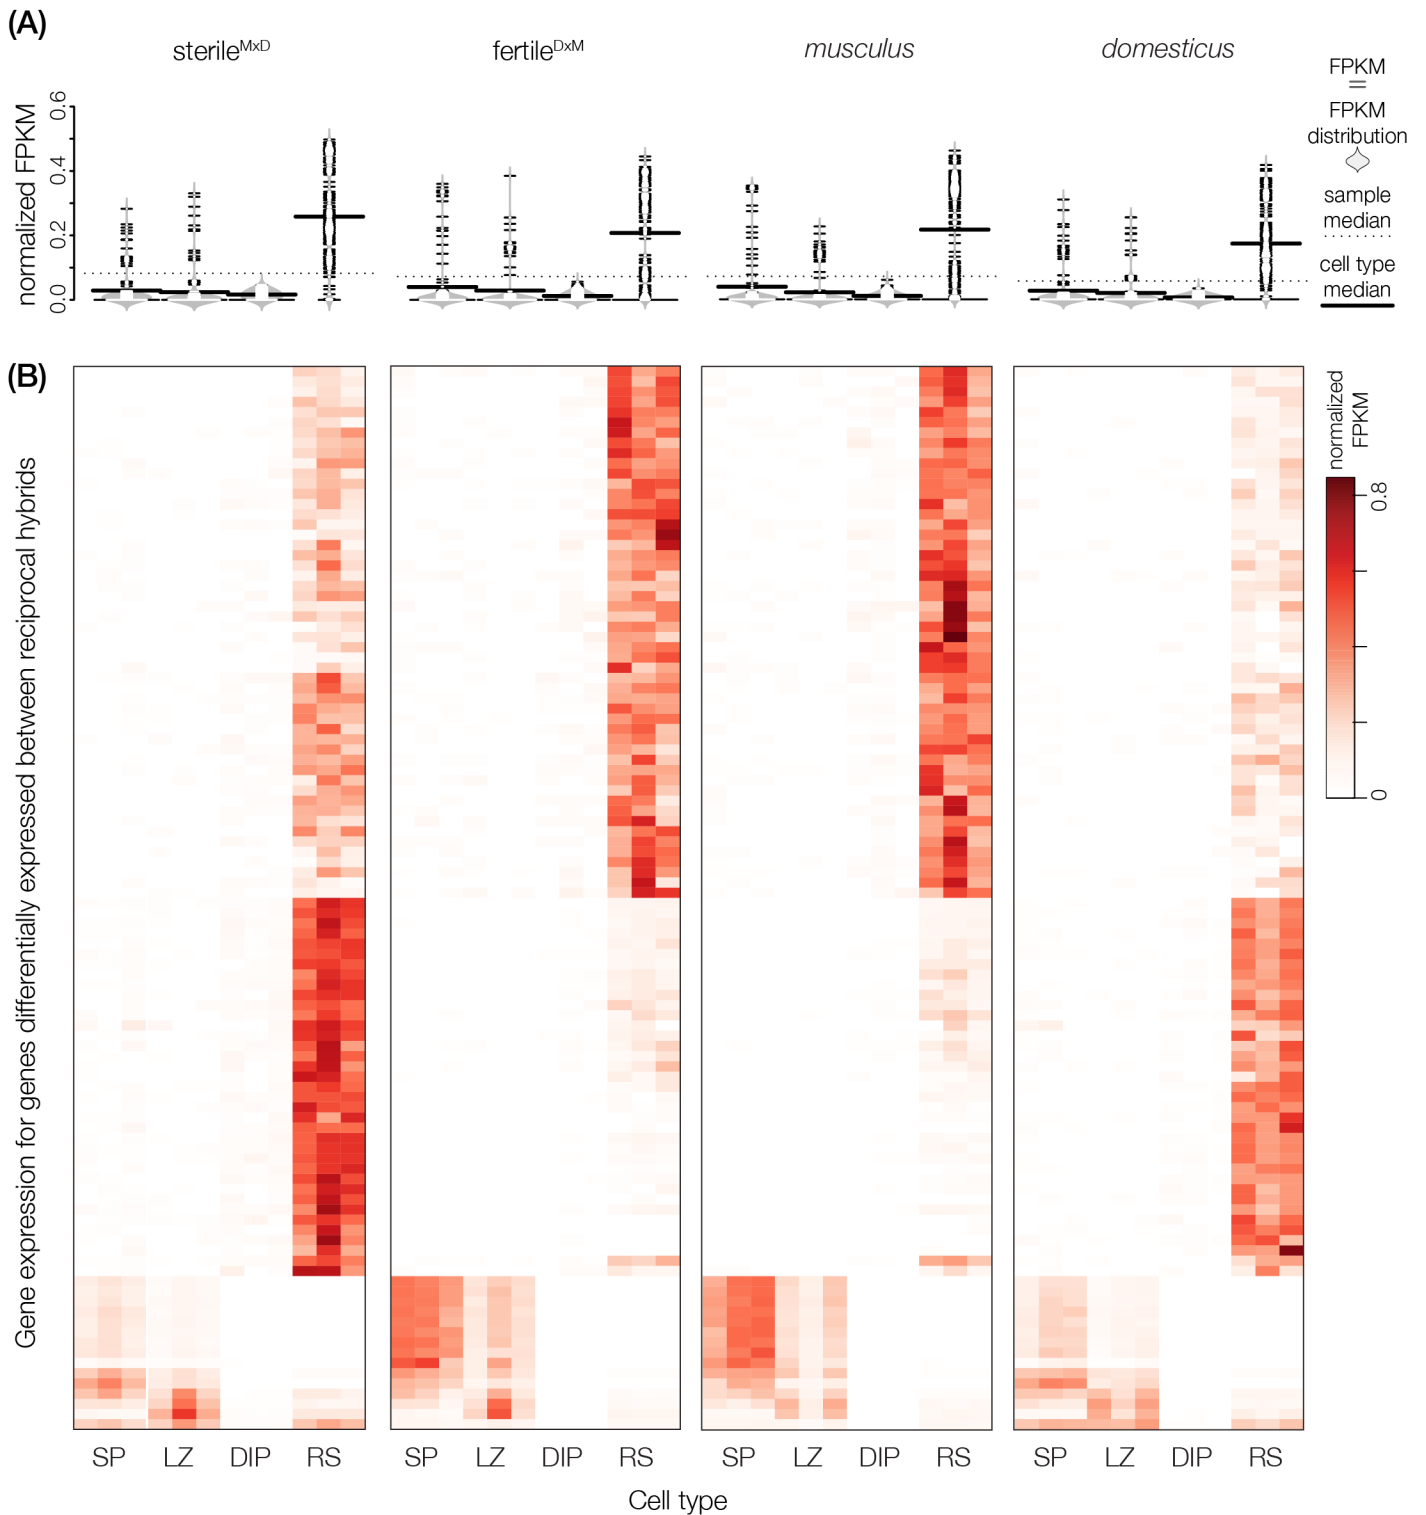

**Figure S6. Y-linked gene expression among different crosses. (A)** Expression distributions for Y-linked DE genes. Plotted with the R package beanplot (Kampstra 2008). **(B)** Y-linked gene expression plotted as normalized FPKM values that are hierarchically clustered using Euclidean distance. FPKM values are normalized so that the sum of squares equals one, R package vegan (Oksanen et al. 2015).

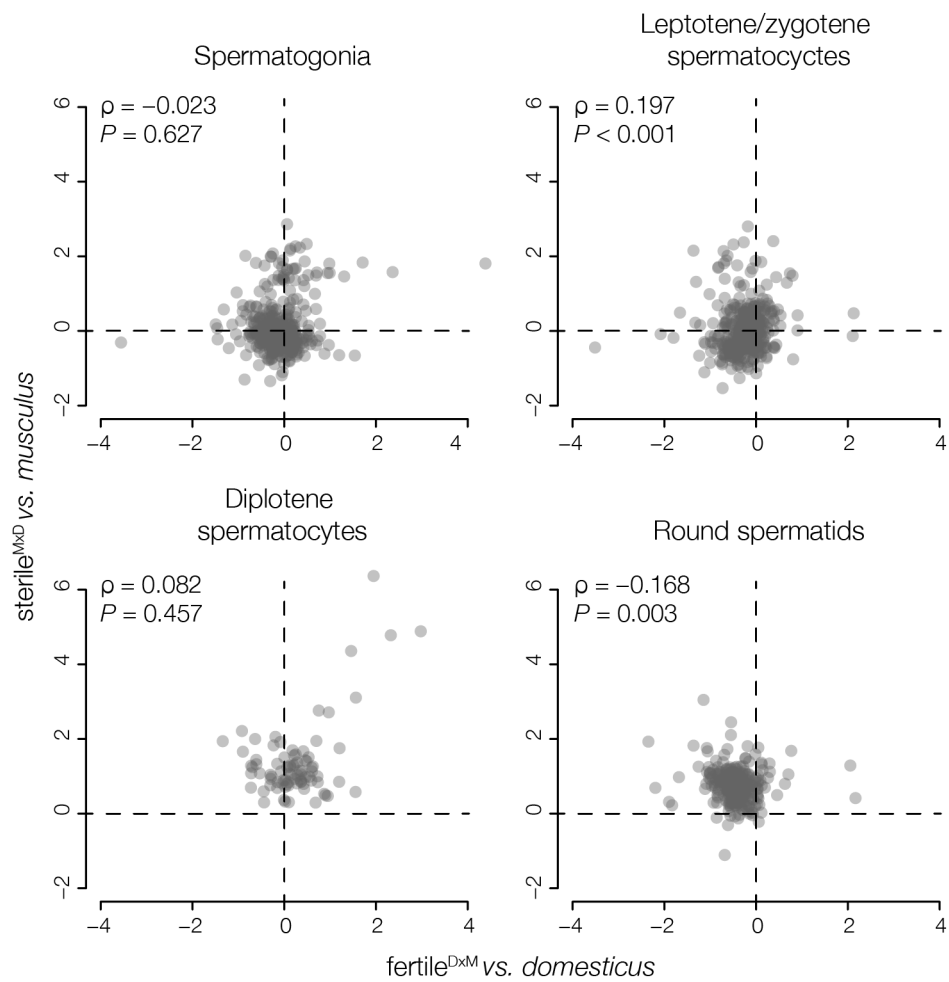

**Figure S7. Correlation in X-linked gene expression between reciprocal hybrids relative to species-specific controls.** Spearman's  $\rho$  of logFC between hybrids and conspecific chromosomes for genes expressed in both comparisons for each cell type.

**Table S1.** Sequencing of spermatogenic cell populations. *mus* = *M. m. musculus*, *dom* = *M. m. domesticus*, SP = spermatogonia, LZ = leptotene/zygotene spermatocytes, DIP = diplotene spermatocytes, RS = round spermatids.

| Individual | Parents                 | Age (days) | Cell type | Raw paired reads | Trimmed paired reads | Pairs uniquely mapped |                   | Assigned fragments | Final fragment counts <sup>1</sup> |
|------------|-------------------------|------------|-----------|------------------|----------------------|-----------------------|-------------------|--------------------|------------------------------------|
|            |                         |            |           |                  |                      | <i>musculus</i>       | <i>domesticus</i> |                    |                                    |
| PPLL15.2   | <i>mus</i> x <i>dom</i> | 75         | DIP       | 11823690         | 11198283             | 9986366               | 9870435           | 8814321            | 8022747                            |
|            |                         |            | RS        | 11564488         | 10904729             | 9659525               | 9559445           | 8604368            | 7841102                            |
| PPLL16.1   |                         | 77         | SP        | 11225816         | 10541448             | 9093009               | 8963739           | 7925116            | 7178330                            |
|            |                         |            | LZ        | 10640990         | 10007905             | 8831713               | 8702229           | 7626639            | 6929577                            |
|            |                         |            | DIP       | 10024328         | 9461558              | 8303698               | 8202947           | 7334175            | 6668364                            |
|            |                         |            | RS        | 9584197          | 8841160              | 7729943               | 7644411           | 7061275            | 6414681                            |
| PPLL17.1   |                         | 67         | SP        | 16843531         | 15883488             | 13865029              | 13664662          | 12347739           | 11142235                           |
|            |                         |            | LZ        | 15246316         | 14475968             | 12789457              | 12592268          | 11013956           | 9975352                            |
|            |                         |            | DIP       | 18634323         | 17514181             | 15372332              | 15173052          | 13780160           | 12515520                           |
|            |                         |            | RS        | 12638865         | 11855331             | 10353609              | 10224547          | 9536156            | 8676459                            |
| PPLL17.3   |                         | 71         | SP        | 11799101         | 11195470             | 9462191               | 9313113           | 8221694            | 7339907                            |
|            |                         |            | LZ        | 9871058          | 9317670              | 8171763               | 8053209           | 7139698            | 6452985                            |
| LLPP17.2   | <i>dom</i> x <i>mus</i> | 62         | DIP       | 9994714          | 9491208              | 8446145               | 8500140           | 7442919            | 6786469                            |
|            |                         |            | RS        | 11262580         | 10624059             | 9370043               | 9442692           | 8554385            | 7827298                            |
| LLPP18.1   |                         | 78         | LZ        | 13908542         | 13141485             | 11651479              | 11645973          | 10008473           | 8997868                            |
| LLPP19.1   |                         |            | 78        | SP               | 16715111             | 15700417              | 13208648          | 13256853           | 11276479                           |
|            |                         |            |           | DIP              | 9029338              | 8566960               | 7510286           | 7569856            | 6723993                            |
| LLPP19.2   |                         | 71         | RS        | 9203792          | 8744380              | 7650046               | 7717771           | 6988852            | 6358231                            |
| LLPP19.3   |                         |            | 90        | DIP              | 9707845              | 9169603               | 8052666           | 8109772            | 7346172                            |
|            |                         |            |           | RS               | 9890829              | 9350563               | 8188883           | 8266029            | 7681904                            |
| LLPP22.7   |                         | 69         | SP        | 9169010          | 8561356              | 7492901               | 7507898           | 6697105            | 6078804                            |
|            |                         |            | LZ        | 10018389         | 9455050              | 8298644               | 8303072           | 7255947            | 6589418                            |
| LLPP22.8   |                         | 67         | SP        | 9648700          | 9065868              | 7732237               | 7771538           | 6816062            | 6073308                            |
|            |                         |            | LZ        | 11705944         | 11170568             | 9848274               | 9853137           | 8601365            | 7740602                            |
| WWLL3.1    | <i>dom</i> x <i>dom</i> | 64         | SP        | 10552073         | 9978631              | 8232867               | 8795436           | 7234186            | 6484571                            |
|            |                         |            | DIP       | 10985159         | 10465262             | 9049623               | 9717157           | 8286803            | 7512520                            |
|            |                         |            | RS        | 11261501         | 10678254             | 9211837               | 9859085           | 8689767            | 7932244                            |
|            |                         |            | LZ        | 10037623         | 9498288              | 8127464               | 8748569           | 7361891            | 6701277                            |
| WWLL4.1    |                         | 61         | LZ        | 10037623         | 9498288              | 8127464               | 8748569           | 7361891            | 6701277                            |
| WWLL6.1    |                         |            | 68        | RS               | 10194381             | 9567846               | 8054662           | 8727864            | 7784837                            |
| WWLL7.1    |                         | 83         |           | DIP              | 9987292              | 9407914               | 8034180           | 8665965            | 7474316                            |
| WWLL7.2    |                         |            | 87        | SP               | 12926098             | 12176326              | 10335353          | 11147407           | 9301722                            |
|            |                         |            |           | LZ               | 10043616             | 9604294               | 8301998           | 8958383            | 7436154                            |
|            |                         |            | DIP       | 10091404         | 9676530              | 8382821               | 9040406           | 7584753            | 6873746                            |
|            |                         |            | RS        | 10411193         | 9939188              | 8646042               | 9219674           | 8302435            | 7584827                            |
| WWLL7.3    |                         | 89         | SP        | 17756412         | 16772899             | 14150405              | 15191648          | 12742813           | 11274302                           |
|            |                         |            | LZ        | 20633018         | 19561703             | 16840391              | 18156243          | 15022061           | 13464643                           |
| CCPP21.1   | <i>mus</i> x <i>mus</i> | 65         | SP        | 15875714         | 14848677             | 13127558              | 12285440          | 11053147           | 10013263                           |
|            |                         |            | LZ        | 13499123         | 12633183             | 11411863              | 10673548          | 9868505            | 9002647                            |
|            |                         |            | DIP       | 10738528         | 10200007             | 9363479               | 8767966           | 8078164            | 7378417                            |
|            |                         |            | RS        | 11097898         | 10502805             | 9576544               | 8997661           | 8491452            | 7802292                            |
| CCPP21.2   |                         | 76         | SP        | 14401271         | 13419249             | 11818296              | 11021435          | 10107916           | 9095887                            |
|            |                         |            | LZ        | 13274948         | 12559289             | 11368859              | 10578063          | 9774289            | 8834333                            |
|            |                         |            | DIP       | 18426482         | 17637976             | 16272253              | 15127992          | 13921878           | 12658466                           |
|            |                         |            | RS        | 11117634         | 10666428             | 9853080               | 9208465           | 8648569            | 7913516                            |
| CCPP21.3   |                         | 62         | SP        | 10875913         | 10336701             | 9178487               | 8557183           | 7936288            | 7196650                            |
|            |                         |            | LZ        | 10214496         | 9615769              | 8645697               | 7995249           | 7499243            | 6838283                            |
|            |                         |            | DIP       | 11234392         | 10680478             | 9749822               | 9052413           | 8534887            | 7793209                            |
|            |                         |            | RS        | 16056467         | 15109625             | 13805493              | 12748107          | 12398613           | 11381744                           |

<sup>1</sup> Final fragment counts include multiply mapped reads for ampliconic/multicopy genes on the X and the Y chromosomes





**Table S3.** Summary of differential expression (DE) between sterile<sup>MxD</sup> – fertile<sup>DxM</sup> hybrid for genes involved in X chromosome inactivation (MSCI, MSUC, PSCR). The FDR corrected p-value is listed for DE genes and genes that are not DE are indicated as not significant (n.s.). Chr, chromosome; SP, spermatogonia; LZ, leptotene zygotene; DIP, diplotene; RS, round spermatid.

|                            | Gene           | Chr  | Differentially expressed genes |       |       |         | Ref |
|----------------------------|----------------|------|--------------------------------|-------|-------|---------|-----|
|                            |                |      | SP                             | LZ    | DIP   | RS      |     |
| X chromosome inactivation  | <i>Atr</i>     | 9    | n.s.                           | n.s.  | n.s.  | n.s.    | 1   |
|                            | <i>Brca1</i>   | 11   | n.s.                           | n.s.  | n.s.  | n.s.    | 1   |
|                            | <i>Cbx1</i>    | 11   | n.s.                           | n.s.  | n.s.  | n.s.    | 1   |
|                            | <i>Cbx3</i>    | 6    | n.s.                           | n.s.  | n.s.  | n.s.    | 1   |
|                            | <i>Cdk2</i>    | 10   | n.s.                           | n.s.  | n.s.  | n.s.    | 2   |
|                            | <i>H2afx</i>   | 9    | n.s.                           | n.s.  | n.s.  | n.s.    | 1   |
|                            | <i>H2afy</i>   | 13   | n.s.                           | n.s.  | n.s.  | n.s.    | 1   |
|                            | <i>H2afz</i>   | 3    | n.s.                           | n.s.  | n.s.  | n.s.    | 1   |
|                            | <i>Hormad1</i> | 3    | n.s.                           | n.s.  | n.s.  | n.s.    | 2   |
|                            | <i>Hormad2</i> | 11   | n.s.                           | n.s.  | n.s.  | n.s.    | 2   |
|                            | <i>Mdc1</i>    | 17   | n.s.                           | n.s.  | n.s.  | n.s.    | 1   |
|                            | <i>Smc1b</i>   | 15   | n.s.                           | n.s.  | n.s.  | n.s.    | 2   |
|                            | <i>Suv39h2</i> | 2    | n.s.                           | n.s.  | n.s.  | n.s.    | 1   |
|                            | <i>Sycp3</i>   | 10   | n.s.                           | n.s.  | n.s.  | n.s.    | 2   |
|                            | <i>Ube2a</i>   | X    | n.s.                           | n.s.  | n.s.  | n.s.    | 1   |
|                            | <i>Ube2b</i>   | 11   | n.s.                           | n.s.  | n.s.  | n.s.    | 1   |
| Candidate hybrid sterility | 4930447F04Rik  | X    | n.s.                           | n.s.  | n.s.  | 0.050   | 3   |
|                            | 4933436I01Rik  | X    | 0.020                          | 0.002 | n.s.  | < 0.001 | 3   |
|                            | <i>Aff2</i>    | X    | NA                             | NA    | NA    | NA      | 3   |
|                            | <i>Ctag2</i>   | X    | n.s.                           | n.s.  | 0.033 | 0.012   | 3   |
|                            | <i>Fmr1nb</i>  | X    | n.s.                           | n.s.  | n.s.  | < 0.001 | 3   |
|                            | <i>Mei4</i>    | 9    | n.s.                           | n.s.  | n.s.  | n.s.    | 3   |
|                            | <i>Msh3</i>    | 13   | n.s.                           | n.s.  | n.s.  | n.s.    | 3   |
|                            | <i>Prdm9</i>   | 17   | n.s.                           | n.s.  | n.s.  | n.s.    | 3   |
|                            | <i>Slitrk2</i> | X    | NA                             | NA    | NA    | NA      | 3   |
| <i>Sycp1</i>               | 3              | n.s. | n.s.                           | n.s.  | n.s.  | 3       |     |

<sup>1</sup>Turner J. M. A., 2007 Meiotic sex chromosome inactivation. *Development* 134: 1823–1831.

<sup>2</sup>Turner J. M. A., 2015 Meiotic Silencing in Mammals. *Annu. Rev. Genet.* 49: 395–412.

<sup>3</sup>Bhattacharyya T., Reifova R., Gregorova S., Simecek P., Gergelits V., Mistrik M., Martincova I., Piálek J., Forejt J., 2014 X chromosome control of meiotic chromosome synapsis in mouse inter-subspecific hybrids. *PLoS Genet* 10: e1004088.
